# Supplementary figures and images for: Inositol phosphatase INPP4B sustains ILC1s and intratumoral NK cells through an AKT-driven pathway
Source: PubMed Central journal article supplement — J Exp Med. 2024 Jan 10;221(3):e20230124. doi: 10.1084/jem.20230124 (PMC10783437; doi:10.1084/jem.20230124), 2024-01-10

Source Data F3F

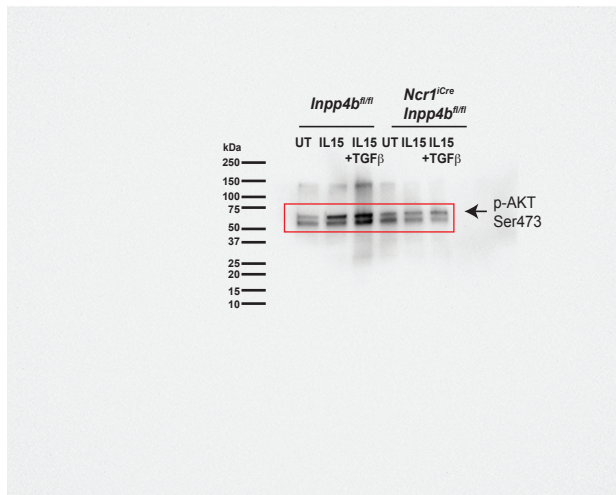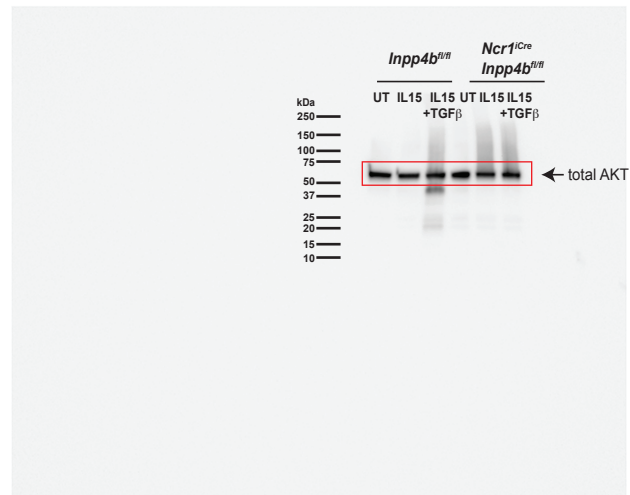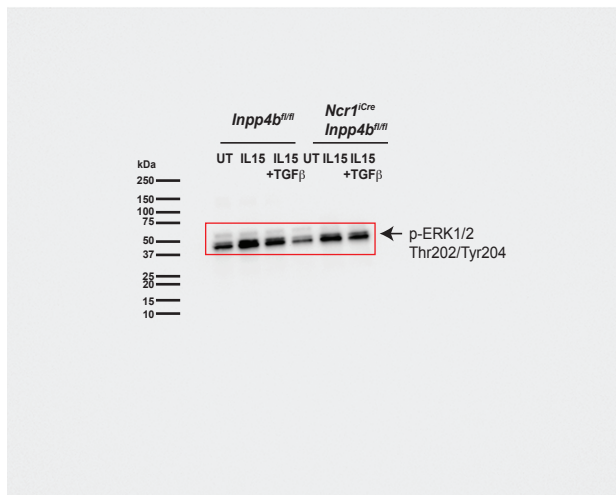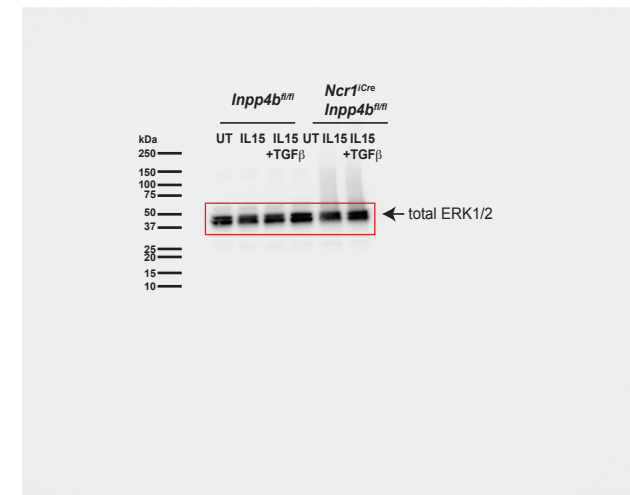

Source Data F3G

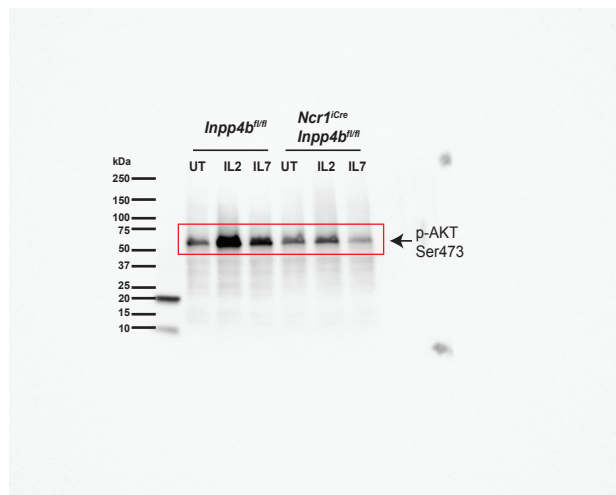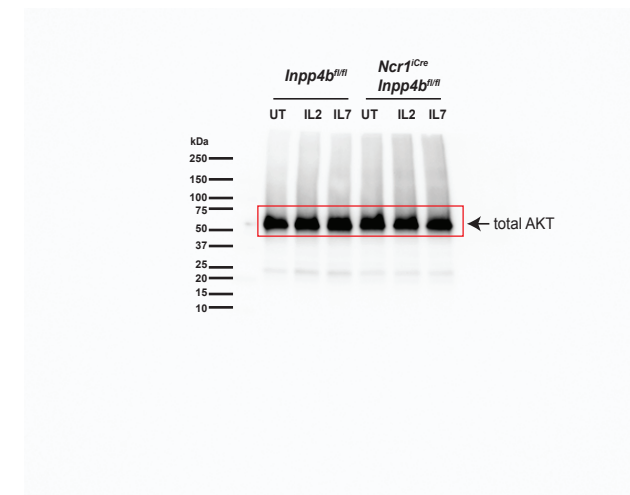

Supplement: JEM_20230124_SourceDataF3.pdf [file JEM_20230124_SourceDataF3.pdf]
